# Supplementary material
Source: MDPI journal article supplement (https://www.mdpi.com/1424-8247/14/11/1121)

**Figure S1.** EZ-Tests® for the control of germ killing of the lead germ *Geobacillus stearothermophilus* after heat sterilization.

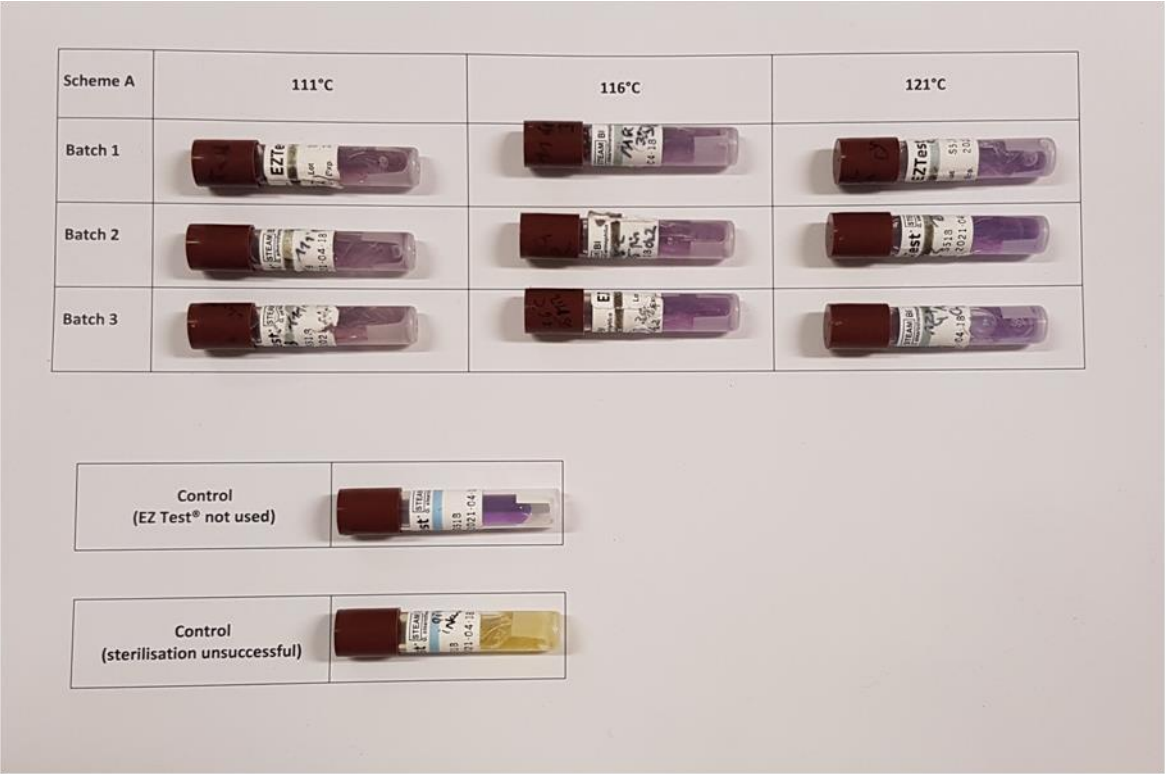

This figure shows the successfully performed heat sterilization at an F0 value suitable for sterility (according to Table 2 in the manuscript).

Graphical representation of the concentrations of degradation products in 10 % glucose solutions at different temperatures (111 °C; 116 °C and 121 °C) and different F0 times according to autoclaving schemes A and B.

**Figure S2.** Concentrations of GO after heat sterilization of 10 % glucose solutions at 111 °C, 116 °C and 121 °C autoclaved according to scheme A ( $n=27$ ).

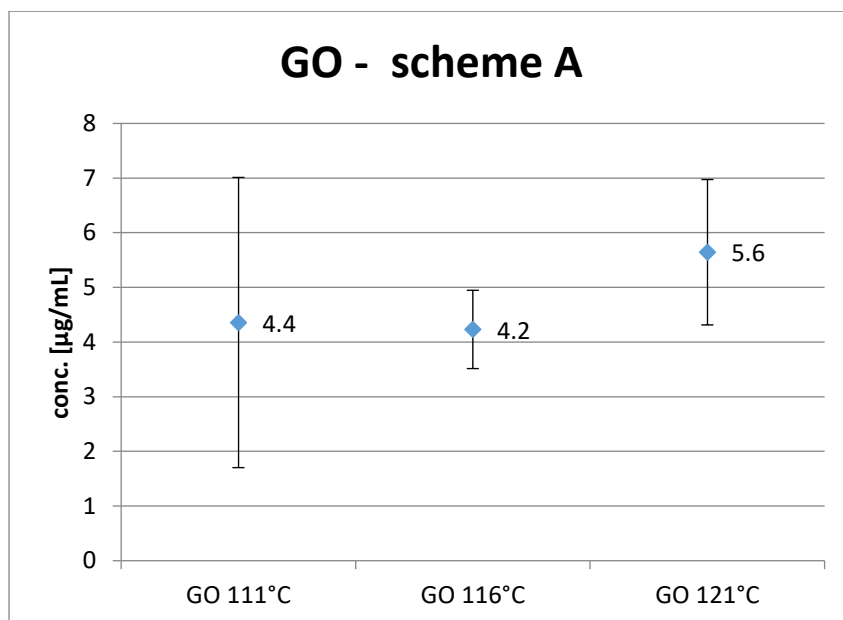

**Figure S3.** Concentrations of MGO after heat sterilization of 10 % glucose solutions at 111 °C, 116 °C and 121 °C autoclaved according to scheme A ( $n=27$ ).

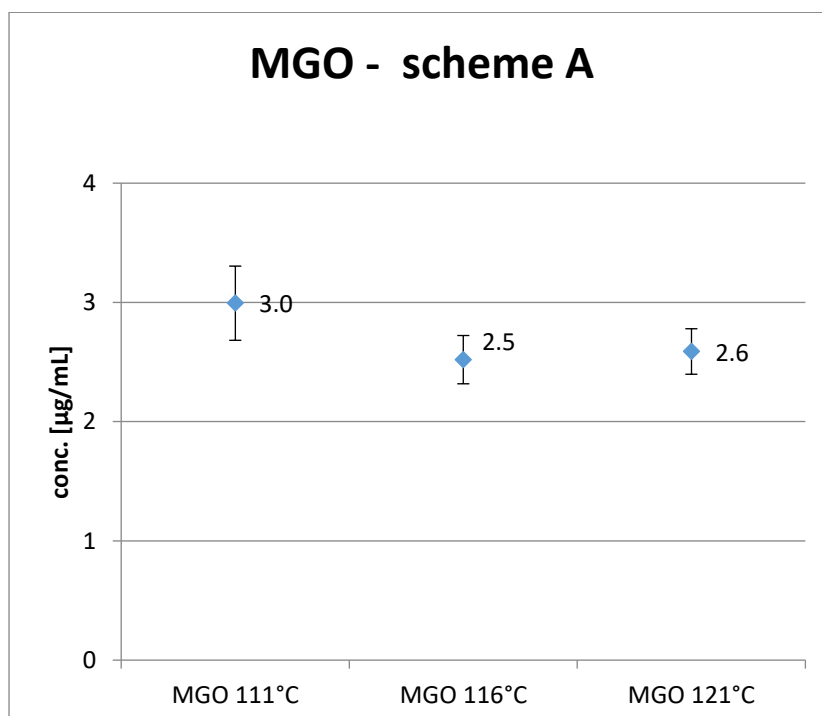

**Figure S4.** Concentrations of 2-KDG after heat sterilization of 10 % glucose solutions at 111 °C, 116 °C and 121 °C autoclaved according to scheme A ( $n=27$ ).

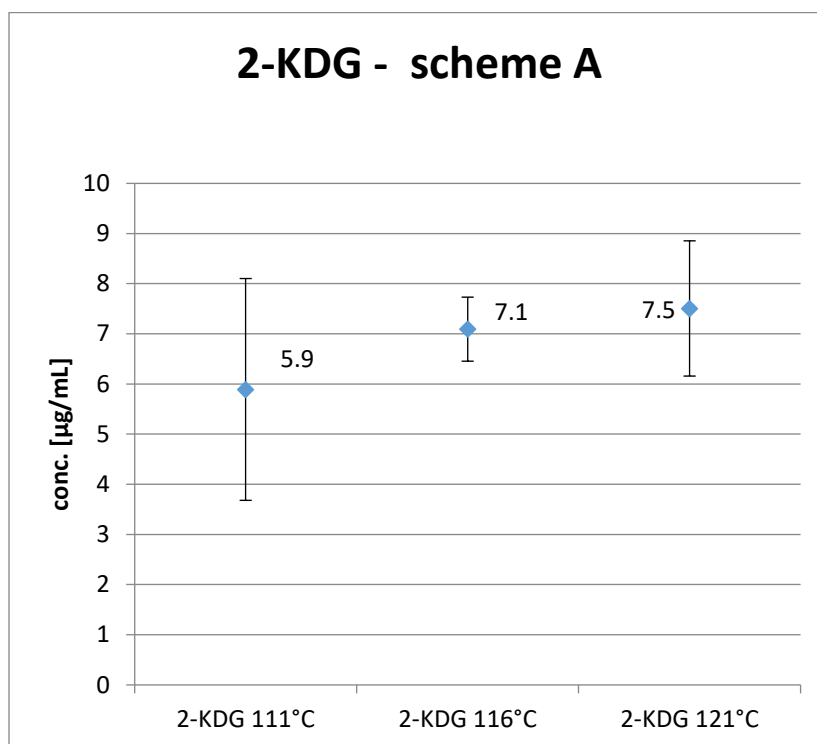

**Figure S5.** Concentrations of 3-DG/3-DGal after heat sterilization of 10 % glucose solutions at 111 °C, 116 °C and 121 °C autoclaved according to scheme A ( $n=27$ ).

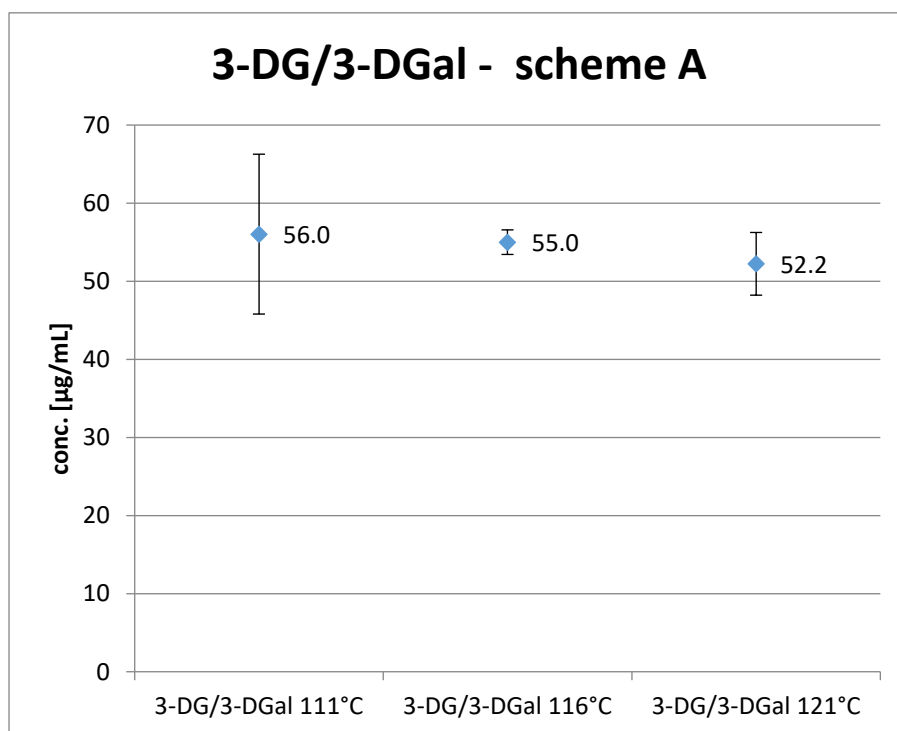

**Figure S6.** Concentrations of 3,4-DGE after heat sterilization of 10 % glucose solutions at 111 °C, 116 °C and 121 °C autoclaved according to scheme A ( $n=27$ ).

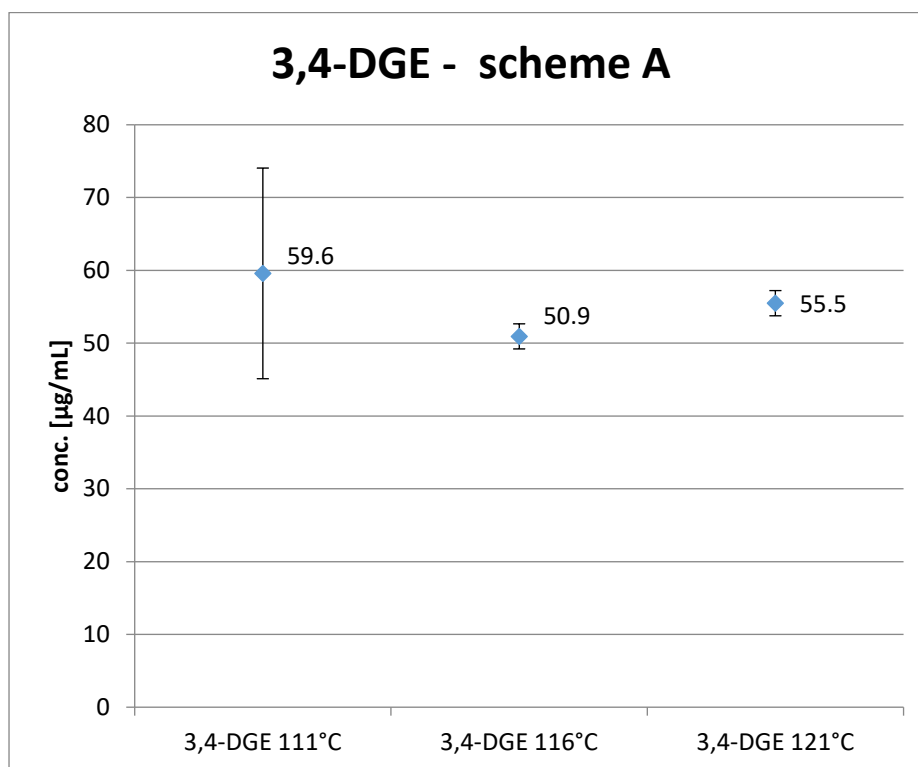

**Figure S7.** Concentrations of 5-HMF after heat sterilization of 10 % glucose solutions at 111 °C, 116 °C and 121 °C autoclaved according to scheme A ( $n=27$ ).

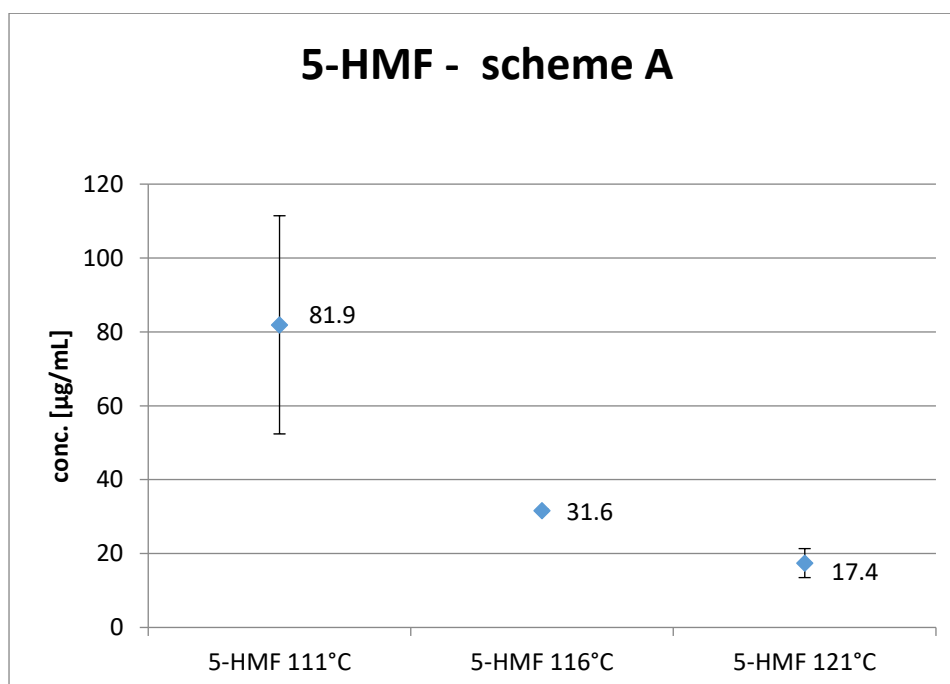

**Figure S8.** Concentrations of GO after heat sterilization of 10 % glucose solutions at 111 °C, 116 °C and 121 °C autoclaved according to scheme B ( $n=27$ ).

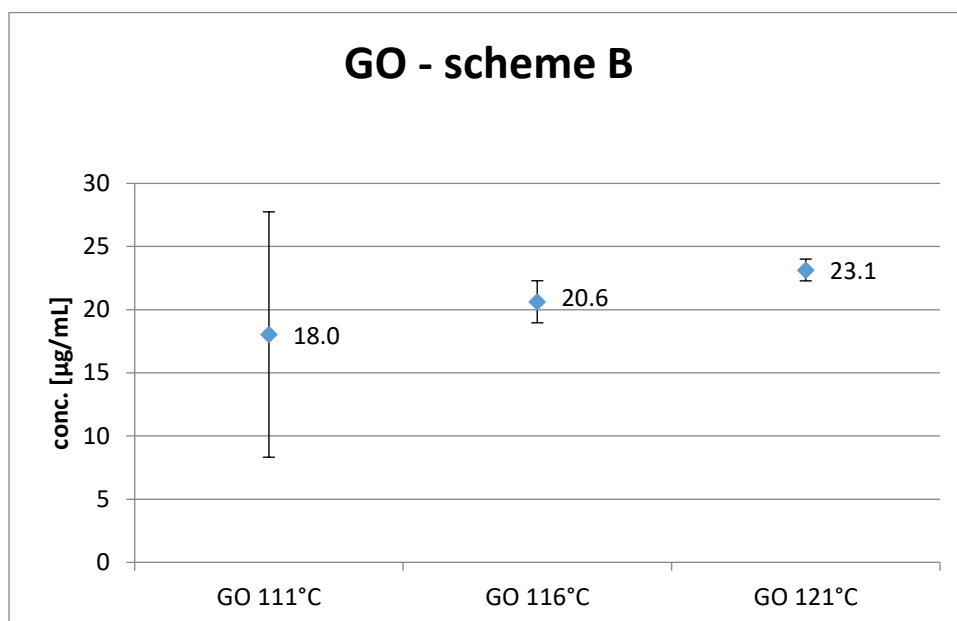

**Figure S9.** Concentrations of MGO after heat sterilization of 10 % glucose solutions at 111 °C, 116 °C and 121 °C autoclaved according to scheme B ( $n=27$ ).

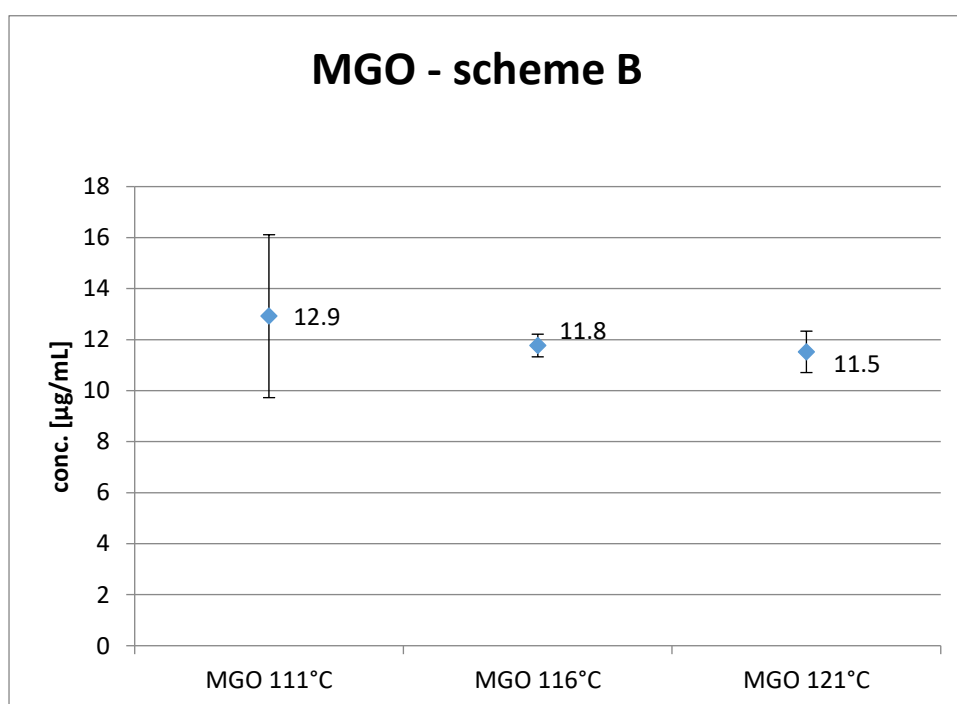

**Figure S10.** Concentrations of 2-KDG after heat sterilization of 10 % glucose solutions at 111 °C, 116 °C and 121 °C autoclaved according to scheme B ( $n=27$ ).

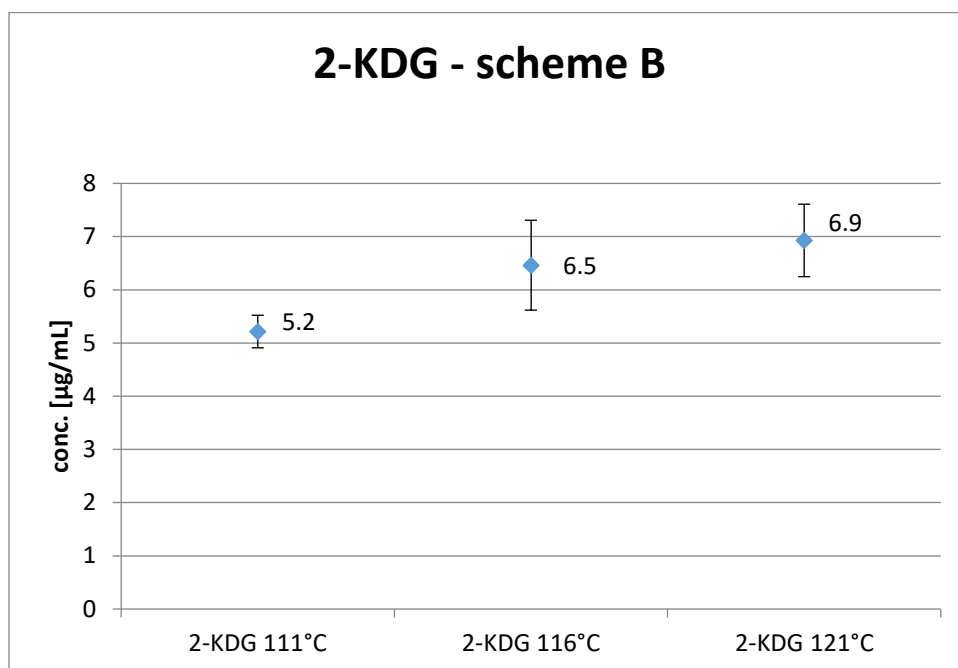

**Figure S11.** Concentrations of 3-DG/3-DGal after heat sterilization of 10 % glucose solutions at 111 °C, 116 °C and 121 °C autoclaved according to scheme B ( $n=27$ ).

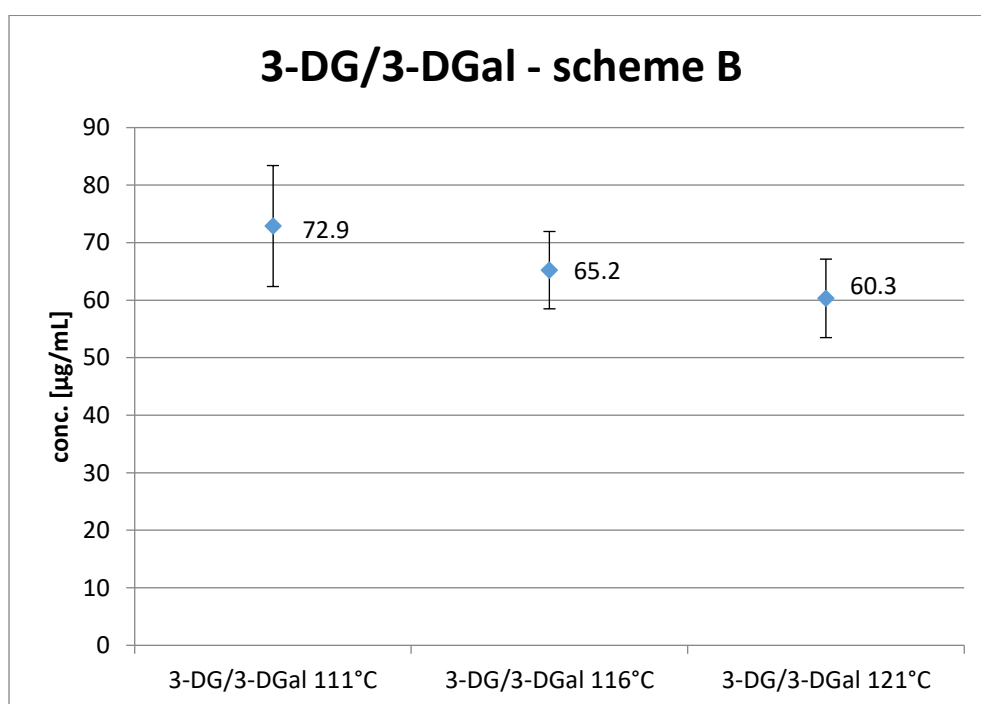

**Figure S12.** Concentrations of 3,4-DGE after heat sterilization of 10 % glucose solutions at 111 °C, 116 °C and 121 °C autoclaved according to scheme B ( $n=27$ ).

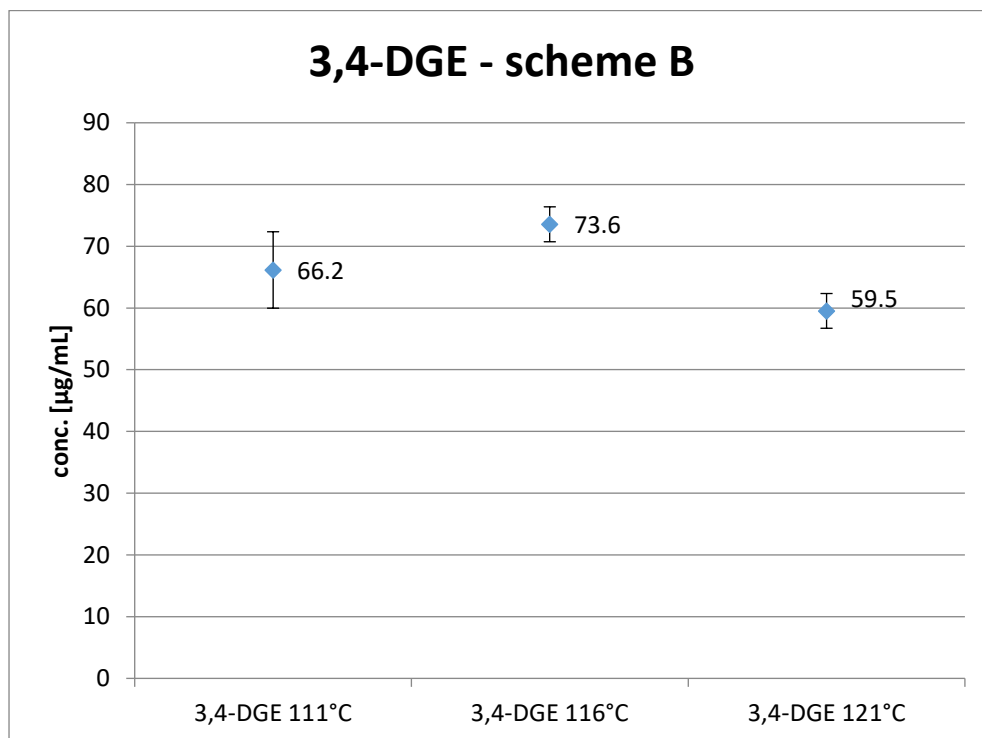

**Figure S13.** Concentrations of 5-HMF after heat sterilization of 10 % glucose solutions at 111 °C, 116 °C and 121 °C autoclaved according to scheme B ( $n=27$ ).

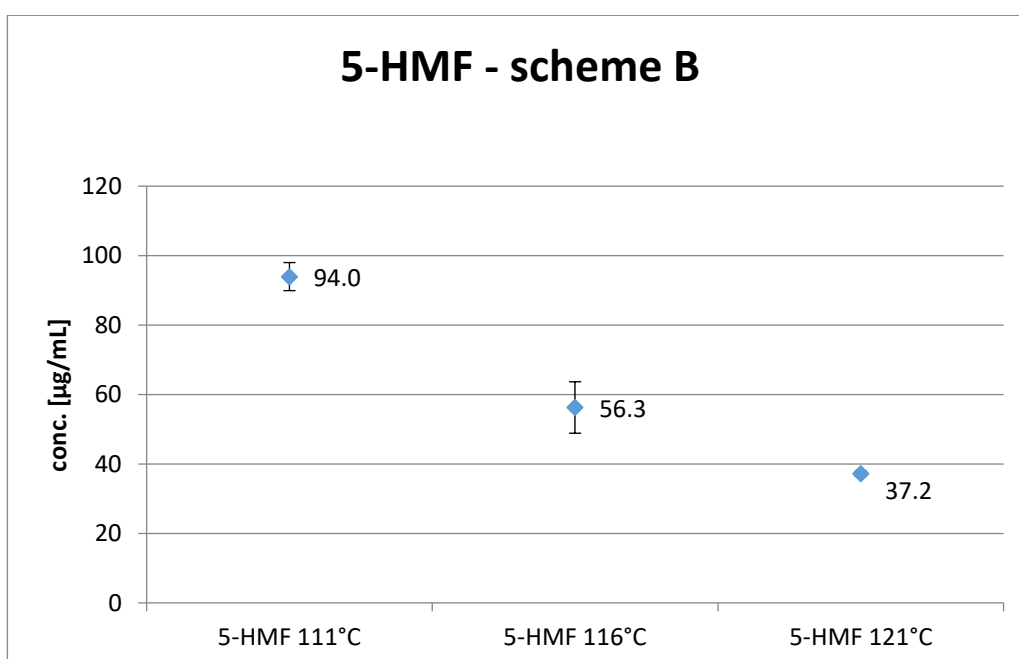

**Figure S14.** Concentrations of GDPs in 10 % (w/v) glucose solutions in PP bottles heat sterilized at 121 °C for 350 min (F0 = 202 min) ( $n=9$ ).

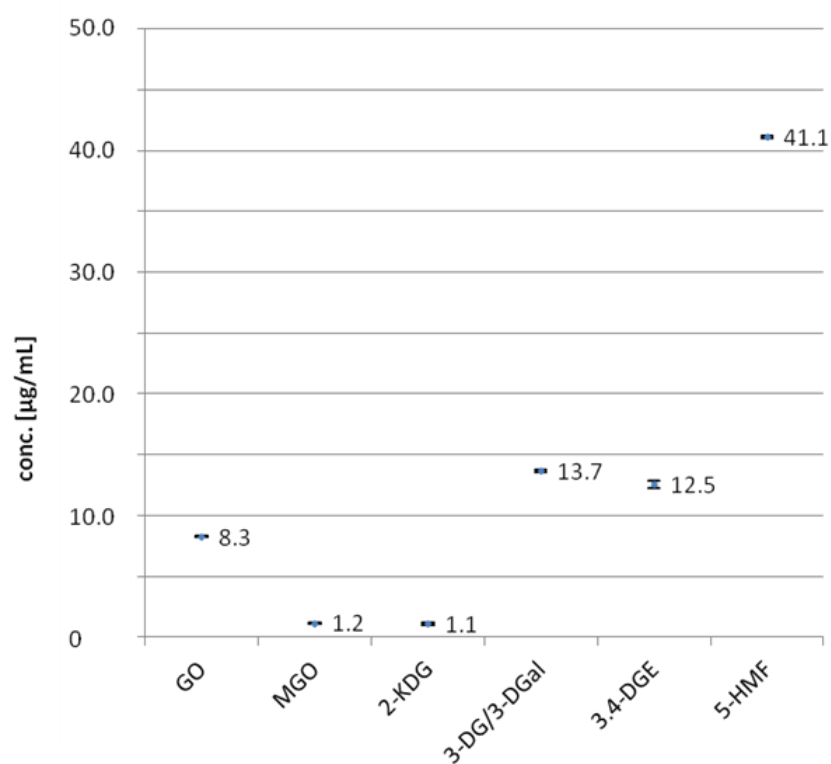

Supplement: s1 [file s1]
